# Supplementary material for: Effective range of non-cell autonomous activator and inhibitor peptides specifying plant stomatal patterning
Source: PubMed Central journal article supplement (PMC7502594; doi:10.1242/dev.192237), 2020-09-11
Supplement: develop-147-192237-s1.pdf [file develop-147-192237-s1.pdf]

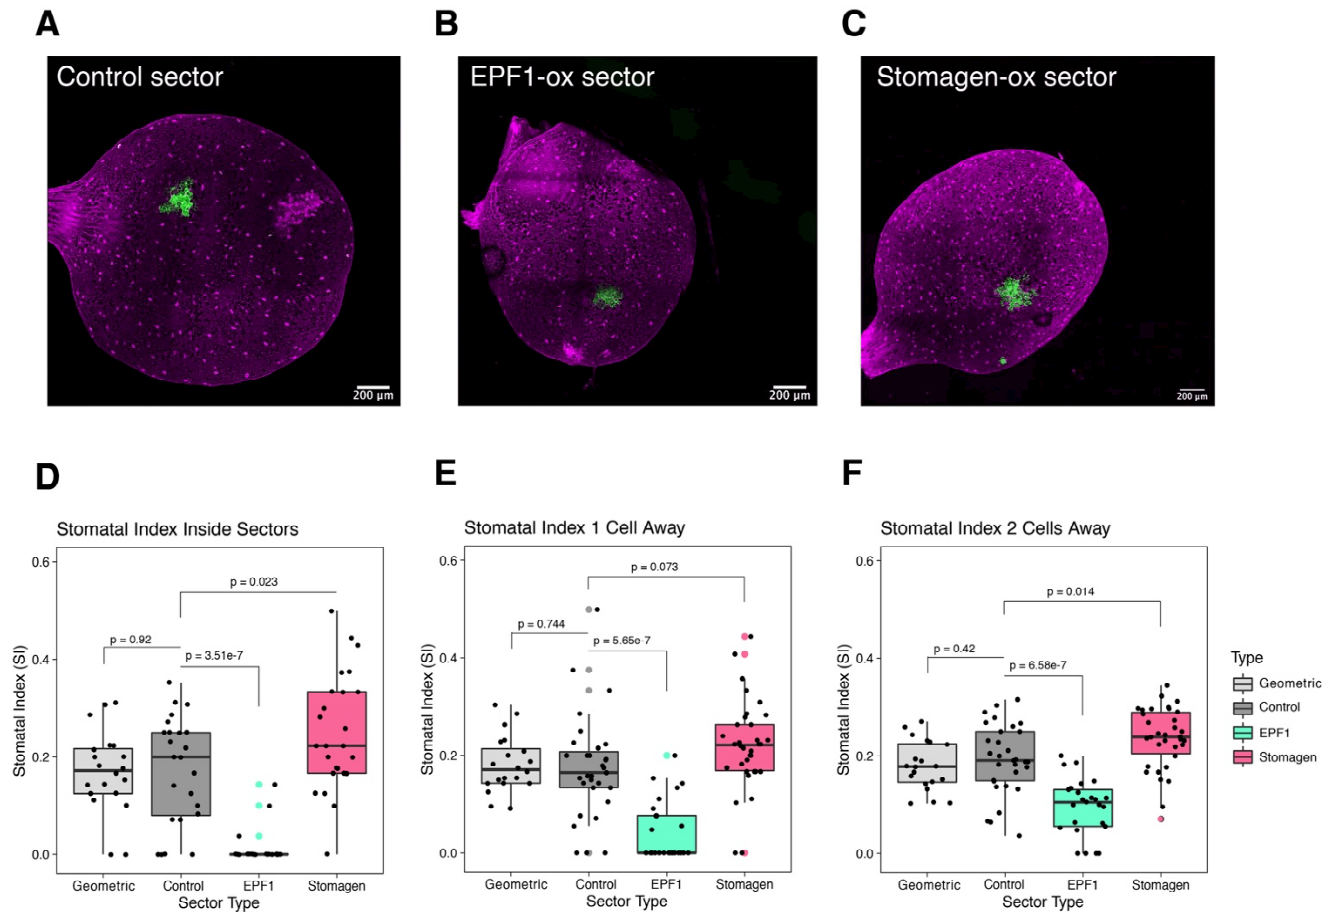

**Fig. S1: Full tile scan images of mosaic seedlings and individual sector-based stomatal index analysis (Related to Figure 1)**

(A) Cotyledon with a control sector, scale bar = 200 μm

(B) Cotyledon with an EPF1-overexpressing (EPF1-ox) sector, scale bar = 200 μm

(C) Cotyledon with a Stomagen-overexpressing (Stomagen-ox) sector, scale bar = 200 μm.

(D-F) Stomatal Index within sectors (D), cells immediately adjacent to sectors (E), and cells adjacent to immediate neighboring cells (F) For wild type, virtual geometric sectors (geometric) of the same size and geometry as real sectors were computationally placed. Individual sectors were analyzed separately without data aggregation. Number of sectors subjected to analysis; n=20 (geometric), n=34 (control), n=25 (EPF1), n=31 (Stomagen). Box plots were generated for geometric (light grey), control (dark grey), EPF1-ox (lime green), and Stomagen-ox (fuchsia), and individual data points (black dots) are jittered. Grey dots, lime green dots and fuchsia dots represent outliers (Q3 + 1.5\*IQR) for control, EPF1-ox, and Stomagen-ox sectors, respectively. For within sector analysis, sectors composed of < 3 cells were uniformly excluded from analysis, as extreme fluctuation of SI (i.e. either 0 or 1) makes the variance among individual sectors too high for statistical analysis. Welch's two-sample t-test was performed for pairwise comparison with control sector data.

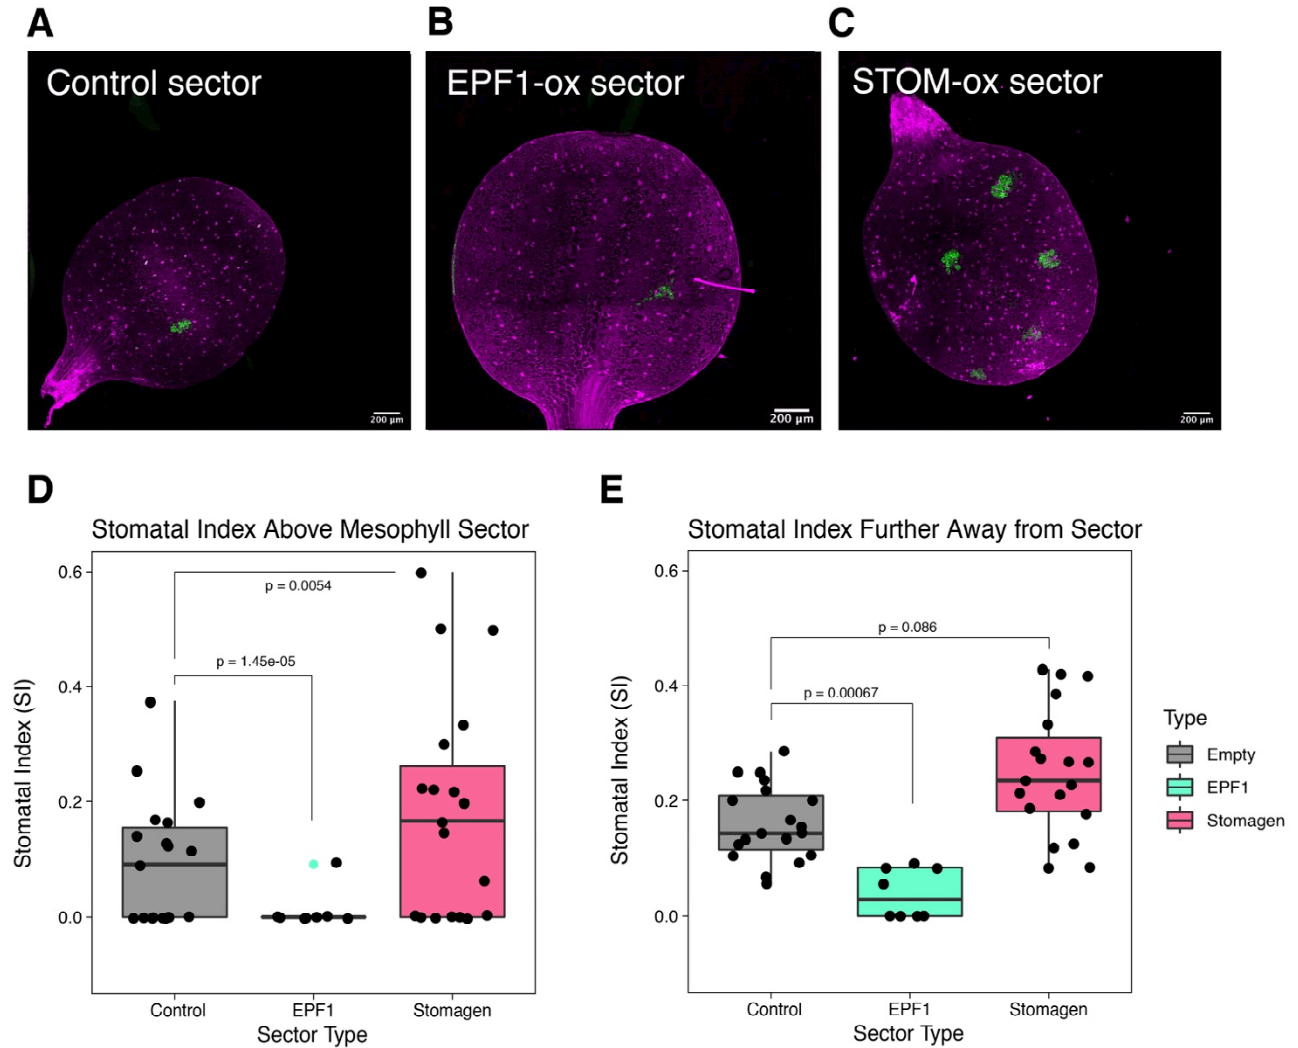

**Fig. S2. Full tile scan images of mosaic seedlings and individual sector-based stomatal index analysis (Related to Figure 2)**

(A) Cotyledon with a control sector

(B) Cotyledon with an EPF1-overexpressing (EPF1-ox) sector

(C) Cotyledon with a Stomagen-overexpressing (STOM-ox) sector

(D and E) Stomatal Index immediately above mesophyll sectors (D) and further away from sectors

(E). Individual sectors were analyzed separately without data aggregation. Number of sectors

subjected to analysis;  $n=19$  (control),  $n=8$  (EPF1),  $n=19$  (Stomagen). Box plots were generated for

control (dark grey), EPF1-ox (lime green), and Stomagen-ox (fuchsia), and individual data points

(black dots) are jittered. Lime green dots represents an outlier ( $Q3 + 1.5 \cdot IQR$ ) for EPF1-ox-sector.

Welch's two-sample T-test was performed for pairwise comparison with control sector data.

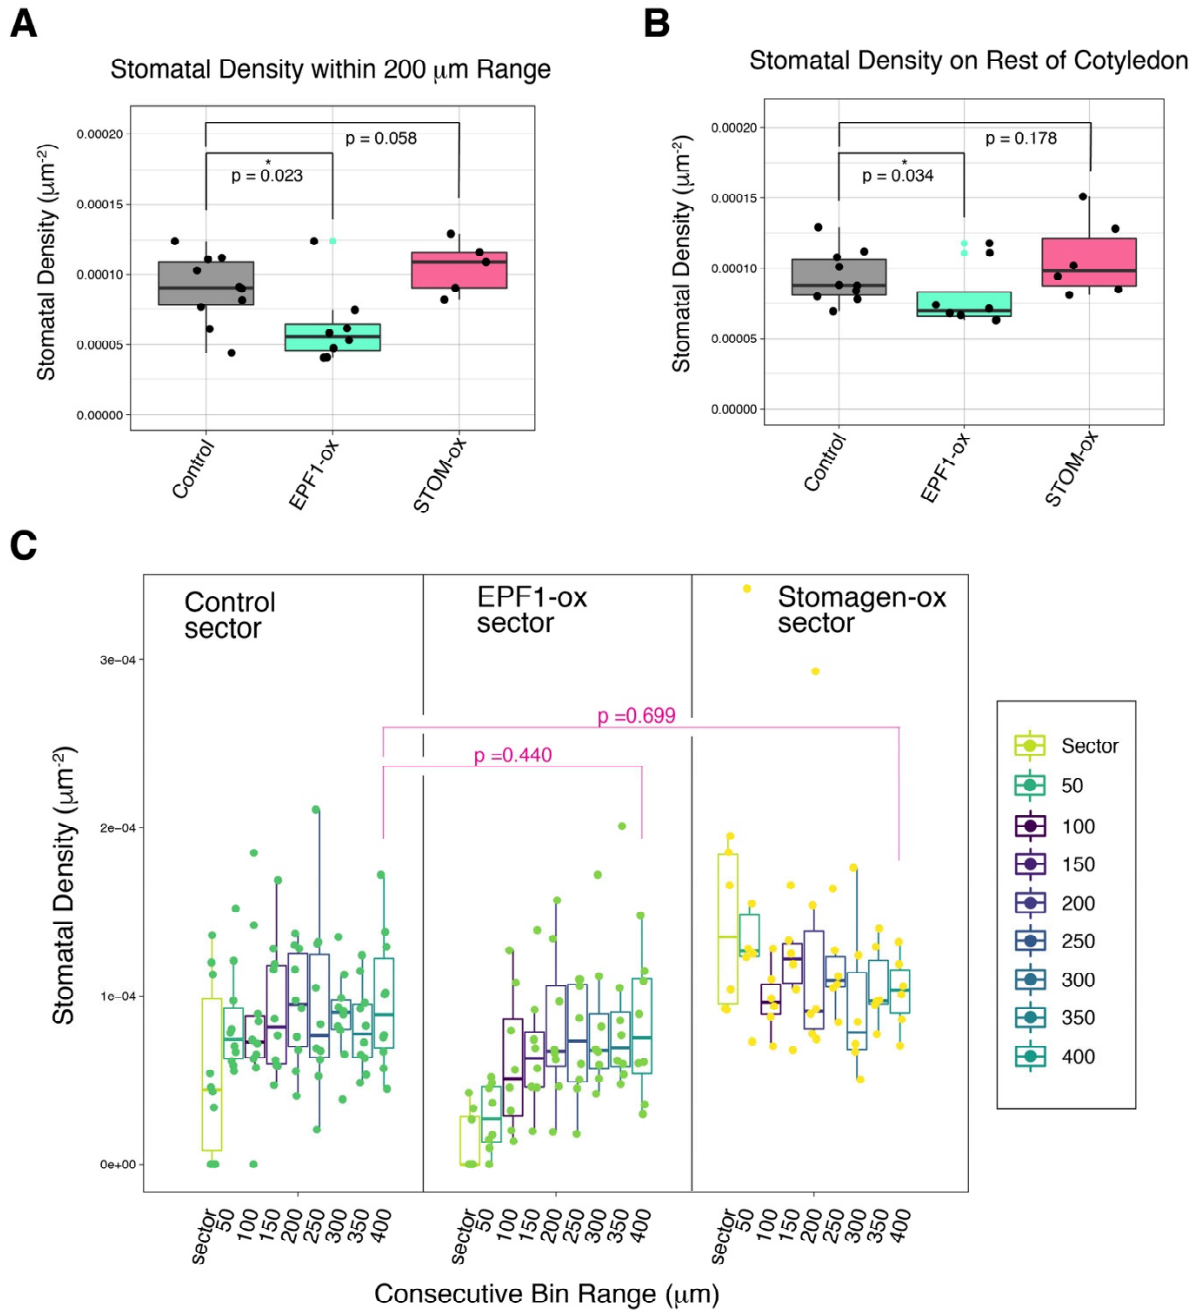

**Fig. S3. Quantitative analysis of effective range at 200  $\mu\text{m}$  from EPF1 and Stomagen-overexpressing sectors**

(A) Stomatal density within 200  $\mu\text{m}$  Range of sectors for individual cotyledons: cotyledons analyzed are same as in Figure 3. Jitter dots on the boxplot correspond to stomatal density from individual sectors. Total number of stomata counted within 200  $\mu\text{m}$ . Range,  $n=298$  (control);  $n=176$  (EPF1-ox);  $n=351$  (STOM-ox). A Mann-Whitney U test was performed to test significant deviation between distributions of stomatal density.

(B) Stomatal density outside of the 200  $\mu\text{m}$  Range in (A) for individual cotyledons: cotyledons analyzed are same as in (A). Jitter dots on the boxplot correspond to stomatal density from individual

sectors. Total number of stomata counted on the remaining area of cotyledons, n=2047 (control); n=1641 (EPF1-ox); n=1103 (STOM-ox). A Mann-Whitney U test was performed to test significant deviation between distributions of stomatal density.

(C) Consecutive bin range approach shows the decay of non-cell autonomous effects of EPF1 and Stomagen. Stomatal density are determined within sectors as well as consecutive bin range of 50  $\mu\text{m}$  increment for control sectors (left), EPF1-ox sectors (middle), and Stomagen-ox sectors (right). Jitter dots on the boxplot correspond to stomatal density from individual sectors. Like Stomagen-ox, the effects of EPF1-ox are no longer statistically significant at 400  $\mu\text{m}$  range. Welch's two sample t-test was performed for a pairwise comparison.

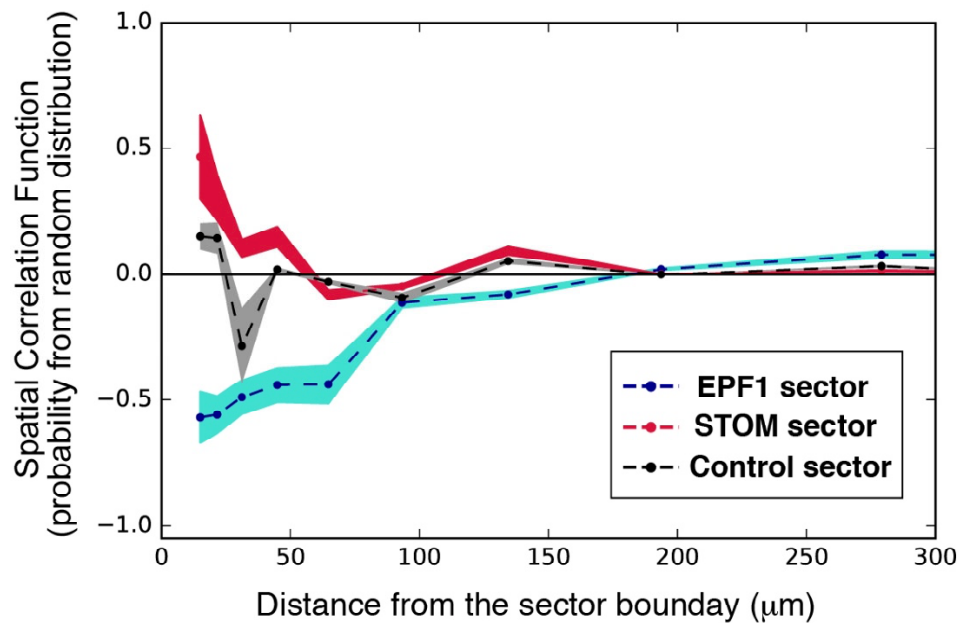

**Fig. S4. SPACE analysis without sector-size filtering (Related to Fig. 5)**

SPACE analysis plot. The autocorrelation of sector to stomata in the function of distance from the sector boundary. The analysis was performed without filtering sector size (see Methods). Control sector autocorrelation (gray) becomes negatively correlated at the sector junction but exhibits subtle peaks at proximity  $\sim 50 \mu\text{m}$  and at  $130\sim 150 \mu\text{m}$ . The STOMAGEN-expressing sector (red) exhibits a strongly positive correlation at the sector boundary, which decays within the first  $\sim 60 \mu\text{m}$ . By contrast, EPF1-expressing sector (blue) exhibits a negative correlation that sharply decays at around  $\sim 100 \mu\text{m}$  and gradually decays toward  $\sim 150\text{-}200 \mu\text{m}$  range. Colored area represents 95% confidence range.

**Table S1. Frequency of Genetic mosaics per seedlings**

| Purpose  | Name                        | Line | Total #<br>Seedlings | # Mosaic Seedlings | Proportion Mosaic |
|----------|-----------------------------|------|----------------------|--------------------|-------------------|
| Control  | pGII227-HSCREN2 in pCB1-7.1 | 3    | 87                   | 42                 | 0.482758621       |
| Control  | pGII227-HSCREN2 in pCB1-7.1 | 4    | 36                   | 13                 | 0.361111111       |
| Control  | pGII227-HSCREN2 in pCB1-7.1 | 5    | 42                   | 19                 | 0.452380952       |
| Control  | pGII227-HSCREN2 in pCB1-7.5 | 1    | 6                    | 4                  | 0.666666667       |
| Control  | pGII227-HSCREN2 in pCB1-8.7 | 1    | 8                    | 8                  | 1                 |
| Control  | pGII227-HSCREN2 in pCB1-8.7 | 2    | 35                   | 26                 | 0.742857143       |
| Control  | pGII227-HSCREN2 in pCB1-8.7 | 3    | 6                    | 3                  | 0.5               |
| Control  | pGII227-HSCREN2 in pCB1-8.7 | 6    | 6                    | 4                  | 0.666666667       |
| EPF1     | pTK112-1 x pCB1-8           | 3    | 12                   | 7                  | 0.583333333       |
| EPF1     | pTK112-1 x pCB1-8           | 4    | 4                    | 1                  | 0.25              |
| EPF1     | pTK112-1 x pCB1-8           | 5    | 8                    | 3                  | 0.375             |
| EPF1     | pTK112-1 x pCB1-8           | 9    | 6                    | 3                  | 0.5               |
| EPF1     | pCB1-7 x pTK112-4           | 3    | 6                    | 1                  | 0.166666667       |
| EPF1     | pCB1-7 x pTK112-4           | 4    | 6                    | 4                  | 0.666666667       |
| EPF1     | pCB1-7 x pTK112-4           | 6    | 6                    | 2                  | 0.333333333       |
| EPF1     | pCB1-7 x pTK112-4           | 7    | 7                    | 2                  | 0.285714286       |
| EPF1     | pCB1-7 x pTK112-4           | 9    | 6                    | 4                  | 0.666666667       |
| EPF1     | pTK112-1 x pCB1-8           | 3.3  | 48                   | 6                  | 0.125             |
| EPF1     | pTK112-1 x pCB1-8           | 4.1  | 90                   | 32                 | 0.355555556       |
| EPF1     | pTK112-1 x pCB1-8           | 4.5  | 20                   | 2                  | 0.1               |
| EPF1     | pTK112-1 x pCB1-8           | 9.1  | 6                    | 1                  | 0.166666667       |
| EPF1     | pCB1-7 x pTK112-4           | 6.2  | 12                   | 2                  | 0.166666667       |
| EPF1     | pCB1-7 x pTK112-4           | 6.6  | 39                   | 8                  | 0.205128205       |
| EPF1     | pCB1-7 x pTK112-4           | 6.8  | 29                   | 10                 | 0.344827586       |
| EPF1     | pCB1-7 x pTK112-4           | 6.3  | 46                   | 15                 | 0.326086957       |
| STOMAGEN | pCB1-8 x pJS107-2           | 3    | 76                   | 36                 | 0.473684211       |
| STOMAGEN | pCB1-8 x pJS107-2           | 6    | 52                   | 21                 | 0.403846154       |
| STOMAGEN | pCB1-8 x pJS107-2           | 3.9  | 106                  | 30                 | 0.283018868       |
| STOMAGEN | pCB1-8 x pJS107-2           | 3.14 | 139                  | 29                 | 0.208633094       |

**Table S2. List of plasmids used in this study**

| Plasmid ID      | Description                    | Insert        | Vector          | BacR       | PlantR | Note                                                                                              | Ref                  |
|-----------------|--------------------------------|---------------|-----------------|------------|--------|---------------------------------------------------------------------------------------------------|----------------------|
| pTK106          | pCRII-EPF1                     | EPF1 cDNA     | pCRII           | Kan        | NA     | to make pTK109                                                                                    | This study           |
| pTK107          | pCRII-EPF2                     | EPF2 cDNA     | pCRII           | Kan        | NA     | to make pTK110                                                                                    | This study           |
| pTK109          | pBnUASPTn-EPF1                 | EPF1 cDNA     | pBnUASPTn       | Amp        | NA     | to make pTK112                                                                                    | This study           |
| pTK110          | pBnUASPTn-EPF2                 | EPF2 cDNA     | pBnUASPTn       | Amp        | NA     | to make pTK113                                                                                    | This study           |
| pTK112          | HSCRE-EPF1                     | EPF1 cDNA     | pGII227-HSCREN2 | Kan        | Hyg    | cre-lox system with EPF1                                                                          | This study           |
| pTK113          | HSCRE-EPF2                     | EPF2 cDNA     | pGII227-HSCREN2 | Kan        | Hyg    | cre-lox system with EPF2                                                                          | This study           |
| pJS104          | pCRII-STOMAGEN                 | STOMAGEN cDNA | pCR 2.1 TOPO    | Amp<br>Kan | NA     | to make pJS105                                                                                    | This study           |
| pJS105          | pBnUASPTn-STOMAGEN             | STOMAGEN cDNA | pBnUASPTn       | Amp        | NA     | to make pJS107                                                                                    | This study           |
| pJS107          | HSCRE-STOMAGEN                 | STOMAGEN cDNA | pGII227-HSCREN2 | Kan        | Hyg    | cre-lox system with STOMAGEN                                                                      | This study           |
| pBnUASPTn       | UAS::MCS                       | NA            | PB2n            | Amp        | NA     | Intermediate plasmid to insert gene of interest under Gal4 UAS                                    | Heidstra et al. 2004 |
| pGII227-HSCREN2 | Hspro::CRE                     | NA            | pGII227         | Kan        | Hyg    | HS promoter driving CRE. UAS with MCS. To make pTK112, 113                                        | Heidstra et al. 2006 |
| pCB1            | 35S::loxCRT1lox:Gal4-UAS-GFPER | NA            | pGreen0229      | Kan        | Basta  | Selectable marker CRT1 intercepted by two lox sites to separate Gal4 from 35S promoter. UAS-GFPER | Heidstra et al. 2006 |

**Table S3. List of primers used in this study**

| Primer Name             | Sequence                               | Purpose                                 | Note            |
|-------------------------|----------------------------------------|-----------------------------------------|-----------------|
| STOMGEN_F               | TGTAGTTCAAGCCTCAAGACCTC                | qRT-PCR<br>STOMAGEN                     | This study      |
| STOMSGEN_rc             | ACTCGTTGTACGTACAAGTTGGT                | qRT-PCR<br>STOMAGEN                     | This study      |
| Act2 5'intergenic_F     | AAAGTTTGTACGGATCGACCA                  | qRT-PCR ACTIN2                          | Han et al. 2018 |
| Act2 5'intergenic_rc    | CGAATTTGAATATGAGCGATGA                 | qRT-PCR ACTIN2                          | Han et al. 2018 |
| EPF1_qRT_F              | ATGCCGTCTTGTGATGGTTAG                  | qRT-PCR EPF1                            | Qi et al. 2017  |
| EPF1_qRT_rc             | TCAAGGGACAGGGTAGGACTT                  | qRT-PCR EPF1                            | Qi et al. 2017  |
| pGII227-HSCREN2.2380.fw | CTCTTCGCTATTACGCCAGCT                  | pGII227-HS-CRE-N2:<br>check for inserts | This study      |
| pGII227-HSCREN2.2968.rc | AGTGAGCTGATACCGCTCGCC                  | pGII227-HS-CRE-N2:<br>check for inserts | This study      |
| pCB1_35Sp_fw            | CTGCAAGGCGATTAAGTTGGGTAAC              | pCB1: check for 35S<br>pro              | This study      |
| pCB1_35Sp_rc            | AACCGGCAGCAGTTCGACATA                  | pCB1: check for 35S<br>pro              | This study      |
| CRT1(F)                 | TTCTATGATATCCTTCCGCTGTG                | pCB1: check for CRT1                    | This study      |
| CRT1 (R)                | GCGTCAGGAACCTGCGACCGTC                 | pCB1: check for CRT1                    | This study      |
| pCB1_GAL4_fw            | TTGCCGGTCTTGCGATGATTA                  | pCB1: check for Gal4                    | This study      |
| pCB1_GAL4_rc            | TGATTACGCCAAGCTCGGAATTAAC              | pCB1: check for Gal4                    | This study      |
| pCB1_ERGFP_fw           | GCGGTAATACGGTTATCCAC                   | pCB1: check for<br>erGFP                | This study      |
| pCB1_ERGFP_rc           | TCTCAAACAAACACATACAGCGACT              | pCB1: check for<br>erGFP                | This study      |
| pBnUASPTn (F)           | TACCGGGCCCCCCTCGAAATTCCT<br>G          | pTK112/3: not actually<br>in T-DNA      | This study      |
| pG7HSCREseq (F)         | GTTTACAATTTGCGGCCATTC                  | pTK112/3: check for<br>UAS::EPF1/2      | This study      |
| EPF1_cDNA_EcoRI (R)     | CCGGAATTCTCAAGGGACAGGGTAG<br>GACTTAT   | pTK112: check for<br>UAS::EPF1          | This study      |
| CREcDNA (F)             | ATGTCCAATTTACTGACCGTACACC              | pTK112/3: check for<br>CRE              | This study      |
| CREcDNA (R)             | CTAATCGCCATCTTCCAGCAGGCGC              | pTK112/3: check for<br>CRE              | This study      |
| BAMHI-EPFL9F            | CGCGGATCCATGAAGCATGAAATGA<br>TGAACA    | Molecular cloning<br>STOMAGEN           | This study      |
| EcoRI-EPFL9withstop.rc  | CCGGAATTCTTATCTATGACAAACAC<br>ATCTATAA | Molecular cloning<br>STOMAGEN           | This study      |
| MfeI-EPFL9withstop.rc   | CCGCAATTGTTATCTATGACAAACAC<br>ATCTATAA | Molecular cloning<br>STOMAGEN           | This study      |
